# Supplementary material for: Coronary Stent Strut Fractures: Classification, Prevalence and Clinical Associations
Source: MDPI journal article supplement (doi:10.3390/jcm10081765), 2021-04-19
Supplement: s1 [file s1]

### Comparison with BRS

In 30 cases (40%), multiple fracture patterns were present in the same device. The prevalence of SF was higher in OCTs performed 6 months or more after implantation (53/117 or 45.3%) versus those performed within 6 months from implantation (22/172 or 12.8%,  $p < 0.001$  by Chi-Square). Patients with SF had a higher prevalence of acute coronary syndromes at index ( $p = 0.013$ ). Devices with SF were more often implanted in the right coronary artery ( $p = 0.021$ ), in de novo ( $p = 0.027$ ) or in thrombotic lesions (both  $p = 0.001$ ) and in CTOs ( $p = 0.042$ ). Predilatation pressure was lower ( $p = 0.013$ ), device-to-artery ratio was larger ( $p = 0.049$ ), postdilatation was less frequent ( $p = 0.025$ ) in devices with SF. At OCT, segments with SF showed slightly larger average stenosis areas and diameters and a larger degree of asymmetry and eccentricity ( $p < 0.001$  for all parameters). The role of device asymmetry and eccentricity was particularly evident for SF patterns 1, 2 and 3 (Supplemental Table S1). The relationship between vessel/device asymmetry/eccentricity and prevalence of SF is presented graphically in Figure 4 and Supplemental Figure S2. Fractures were associated (Table 1 and Figure 5) with malapposition ( $p = 0.005$ ), peri-strut low-intensity areas ( $p = 0.001$ ) and subintimal calcium ( $p < 0.001$ ).

Figure 2 describes the different patterns of SF in the two device types. While the patterns of SF were relatively evenly distributed in DES, pattern 1 was ~four times more frequent in BRS.

#### Parameters Associated with SF

The results of the uni- and multivariate logistic regression analysis are shown in Supplemental Tables 2B. Implantation of BRS in patients with previous by-pass surgery (OR:17.8 [4.0–79.7],  $p < 0.001$ ), in the RCA (0.47 [0.3–0.8],  $p = 0.002$ ), in calcific lesions (OR:3.5 [2.0–6.1],  $p < 0.001$ ), and the degree of residual stenosis after predilation as well as the predilatation balloon diameter were associated with SF.

**Supplemental Table S1.** Parameters of device asymmetry and eccentricity. Both eccentricity and asymmetry tended to be consistently larger in devices with fractures, independently of the device type. BVS.

| Maximal Lumen Asymmetry    |     |         |      |        |      |            | Maximal Stent Asymmetry    |     |         |      |        |      |            |
|----------------------------|-----|---------|------|--------|------|------------|----------------------------|-----|---------|------|--------|------|------------|
|                            |     | Without |      | With   |      | $p$ -Value |                            |     | Without |      | With   |      | $p$ -Value |
|                            |     | Median  | IQR  | Median | IQR  |            |                            |     | Median  | IQR  | Median | IQR  |            |
| Fracture                   | BVS | 0.22    | 0.11 | 0.29   | 0.17 | <0.001     | Fracture                   | BVS | 0.2     | 0.1  | 0.24   | 0.14 | <0.001     |
|                            | DES | 0.23    | 0.1  | 0.26   | 0.21 | 0.02       |                            | DES | 0.21    | 0.1  | 0.26   | 0.18 | 0.01       |
| Pattern 1                  | BVS | 0.22    | 0.12 | 0.26   | 0.17 | 0.06       | Pattern 1                  | BVS | 0.21    | 0.12 | 0.23   | 0.11 | 0.38       |
|                            | DES | 0.23    | 0.11 | 0.37   | 0.13 | 0.02       |                            | DES | 0.21    | 0.1  | 0.37   | 0.16 | 0.01       |
| Pattern 2                  | BVS | 0.23    | 0.12 | 0.32   | 0.23 | 0.05       | Pattern 2                  | BVS | 0.21    | 0.1  | 0.3    | 0.21 | 0.04       |
|                            | DES | 0.23    | 0.11 | 0.23   | 0.13 | 0.87       |                            | DES | 0.21    | 0.1  | 0.21   | 0.1  | 0.84       |
| Pattern 3                  | BVS | 0.22    | 0.11 | 0.33   | 0.12 | <0.001     | Pattern 3                  | BVS | 0.21    | 0.11 | 0.31   | 0.21 | 0.01       |
|                            | DES | 0.23    | 0.11 | 0.26   | 0.1  | 0.7        |                            | DES | 0.21    | 0.1  | 0.25   | 0.14 | 0.46       |
| Pattern 4                  | BVS | 0.23    | 0.12 | 0.29   | 0.23 | 0.05       | Pattern 4                  | BVS | 0.21    | 0.11 | 0.27   | 0.21 | 0.2        |
|                            | DES | 0.23    | 0.11 | 0.42   | 0.29 | 0.05       |                            | DES | 0.21    | 0.1  | 0.34   | 0.23 | 0.15       |
| Minimal Lumen Eccentricity |     |         |      |        |      |            | Minimal Stent Eccentricity |     |         |      |        |      |            |
|                            |     | Without |      | With   |      | $p$ -value |                            |     | Without |      | With   |      | $p$ -value |
|                            |     | median  | IQR  | median | IQR  |            |                            |     | median  | IQR  | median | IQR  |            |
| Fracture                   | BVS | 0.7     | 0.12 | 0.63   | 0.12 | <0.001     | Fracture                   | BVS | 0.75    | 0.12 | 0.7    | 0.11 | <0.001     |
|                            | DES |         |      |        |      |            |                            | DES |         |      |        |      |            |

|           |     |      |      |      |      |      |           |     |      |      |      |      |      |
|-----------|-----|------|------|------|------|------|-----------|-----|------|------|------|------|------|
|           | DES | 0.71 | 0.11 | 0.67 | 0.14 | 0.09 |           | DES | 0.76 | 0.09 | 0.74 | 0.15 | 0.31 |
| Pattern 1 | BVS | 0.69 | 0.13 | 0.66 | 0.12 | 0.02 | Pattern 1 | BVS | 0.74 | 0.12 | 0.71 | 0.12 | 0.01 |
|           | DES | 0.7  | 0.12 | 0.61 | 0.16 | 0.02 |           | DES | 0.77 | 0.09 | 0.65 | 0.14 | 0.01 |
| Pattern 2 | BVS | 0.69 | 0.13 | 0.6  | 0.1  | 0.01 | Pattern 2 | BVS | 0.74 | 0.12 | 0.69 | 0.1  | 0.03 |
|           | DES | 0.7  | 0.13 | 0.68 | 0.1  | 0.83 |           | DES | 0.76 | 0.1  | 0.79 | 0.1  | 0.42 |
| Pattern 3 | BVS | 0.69 | 0.13 | 0.62 | 0.12 | 0.01 | Pattern 3 | BVS | 0.74 | 0.12 | 0.7  | 0.07 | 0.01 |
|           | DES | 0.7  | 0.13 | 0.72 | 0.15 | 0.66 |           | DES | 0.76 | 0.1  | 0.78 | 0.11 | 0.83 |
| Pattern 4 | BVS | 0.68 | 0.13 | 0.49 | 0.25 | 0.01 | Pattern 4 | BVS | 0.73 | 0.12 | 0.76 | 0.12 | 0.92 |
|           | DES | 0.7  | 0.12 | 0.56 | 0.39 | 0.15 |           | DES | 0.76 | 0.1  | 0.73 | 0.25 | 0.56 |

BVS: bioresorbable scaffolds.

**Supplemental Table S2A.** Univariate associations of SF with metallic stents.

|                                   | Coefficient | SE     | <i>p</i> |    |       |
|-----------------------------------|-------------|--------|----------|----|-------|
| Patient Characteristics           |             |        |          |    |       |
| Age                               | 0.0049      | 0.0186 | 0.7929   |    |       |
| Male                              | −0.0164     | 0.4735 | 0.9723   |    |       |
| Family History                    | −0.3958     | 0.4478 | 0.3768   |    |       |
| Diabetes                          | −0.2086     | 0.4491 | 0.6422   |    |       |
| Hypertension                      | −0.1809     | 0.4772 | 0.7046   |    |       |
| Hyperlipidemia                    | −0.2927     | 0.4057 | 0.4707   |    |       |
| Smoking                           | 0.0674      | 0.1711 | 0.6936   |    |       |
| Prior MI                          | −0.2716     | 0.4507 | 0.5468   |    |       |
| Atrial fibrillation               | −0.0055     | 0.5857 | 0.9925   |    |       |
| Valve disease                     | 0.7633      | 0.4533 | 0.0922   |    |       |
| Prior PCI                         | 0.0499      | 0.4113 | 0.9034   |    |       |
| CABG                              | −0.4722     | 1.0750 | 0.6605   |    |       |
| Reason PCI                        | 0.0267      | 0.1516 | 0.8602   |    |       |
| Lesion/procedural Characteristics |             |        |          |    |       |
| Vessel                            | −0.0831     | 0.2638 | 0.7527   |    |       |
| ACC/AHA Type                      | −0.2824     | 0.2391 | 0.2375   |    |       |
| De novo                           | −0.1690     | 0.4783 | 0.7239   |    |       |
| Thrombus                          | 0.0519      | 0.6041 | 0.9316   |    |       |
| CTO                               | 0.4559      | 1.1387 | 0.6889   |    |       |
| Overlap                           | 0.4578      | 0.4342 | 0.2917   |    |       |
| Bifurcation                       | 1.3274      | 0.4959 | 0.0074   |    |       |
| Predilatation                     | 1.2677      | 0.6551 | 0.0530   |    |       |
| Predil. balloondiameter           | −0.0643     | 0.1154 | 0.5775   |    |       |
| Predil. balloon length            | 0.0209      | 0.0580 | 0.7183   |    |       |
| Predil. balloon pressure          | −0.0113     | 0.0629 | 0.8576   |    |       |
| Implantation pressure             | −0.1070     | 0.0998 | 0.2839   |    |       |
| Device to artery ratio            | 3.0130      | 1.6816 | 0.0732   |    |       |
| Postdilatation                    | −0.6273     | 0.4230 | 0.1381   |    |       |
| Postdil. balloon diam             | −0.9006     | 0.5613 | 0.1086   |    |       |
| Postdil. balloon length           | 0.0727      | 0.0800 | 0.3629   |    |       |
| Postdil. balloon pressure         | −0.1224     | 0.0838 | 0.1439   |    |       |
| Final residual stenosis           | −0.0741     | 0.0563 | 0.1876   |    |       |
| Calcium > 180°                    | 1.3585      | 0.2927 | 0.0000   |    |       |
| Multivariate analysis             |             |        |          |    |       |
|                                   | Coefficient | SE     | <i>p</i> | OR | 95%CI |

|                               |        |        |        |        |                   |
|-------------------------------|--------|--------|--------|--------|-------------------|
| <b>Bifurcation</b>            | 1.2507 | 0.5831 | 0.0320 | 3.4928 | 1.1139 to 10.9523 |
| <b>Predilatation</b>          | 1.3753 | 0.7074 | 0.0519 |        |                   |
| <b>Calcium &gt; 180°</b>      | 1.3753 | 0.3031 | 0.0000 | 3.9562 | 2.1841 to 7.1663  |
| <b>Time from index to OCT</b> | 0.0005 | 0.0005 | 0.3291 |        |                   |

PCI: percutaneous coronary intervention; CABG: coronary artery by-pass graft; CTO: chronic total occlusion.

**Supplemental Table S2B.** Univariate associations of SF – bioresorbable scaffolds.

|                                          | <b>Coefficient</b> | <b>SE</b> | <b>p</b> |           |                   |
|------------------------------------------|--------------------|-----------|----------|-----------|-------------------|
| <b>Patient characteristics</b>           |                    |           |          |           |                   |
| Age                                      | -0.0108            | 0.0117    | 0.3566   |           |                   |
| Male                                     | 0.6641             | 0.3770    | 0.0782   |           |                   |
| Family History                           | -0.3115            | 0.3008    | 0.3004   |           |                   |
| Diabetes                                 | -0.5830            | 0.3653    | 0.1105   |           |                   |
| Hypertension                             | 0.2319             | 0.3215    | 0.4708   |           |                   |
| Hyperlipidemia                           | -0.2128            | 0.2778    | 0.4437   |           |                   |
| Smoking                                  | -0.0768            | 0.1107    | 0.4880   |           |                   |
| Prior MI                                 | 0.4152             | 0.3121    | 0.1834   |           |                   |
| Atrial fibrillation                      | -0.2695            | 0.8523    | 0.7519   |           |                   |
| Valve disease                            | 0.0656             | 0.3732    | 0.8605   |           |                   |
| Prior PCI                                | 0.1469             | 0.2806    | 0.6006   |           |                   |
| CABG                                     | 2.1072             | 0.6582    | 0.0014   |           |                   |
| Reason PCI                               | 0.1056             | 0.1103    | 0.3382   |           |                   |
| <b>Lesion/procedural Characteristics</b> |                    |           |          |           |                   |
| Vessel                                   | -0.4648            | 0.1812    | 0.0103   |           |                   |
| ACC/AHA Type                             | 0.2636             | 0.1273    | 0.0383   |           |                   |
| De novo                                  | 0.2907             | 0.5664    | 0.6079   |           |                   |
| Thrombus                                 | 0.4974             | 0.3070    | 0.1052   |           |                   |
| CTO                                      | -1.2799            | 1.0516    | 0.2236   |           |                   |
| Overlap                                  | -0.0936            | 0.3344    | 0.7797   |           |                   |
| Bifurcation                              | -0.0534            | 0.6644    | 0.9359   |           |                   |
| Predilatation                            | -0.0232            | 0.7704    | 0.9760   |           |                   |
| Predil. balloon diameter                 | 0.1052             | 0.0494    | 0.0332   |           |                   |
| Predil. balloon length                   | 0.0413             | 0.0345    | 0.2315   |           |                   |
| Predil. balloon pressure                 | -0.0007            | 0.0459    | 0.9880   |           |                   |
| Implantation pressure                    | 0.0874             | 0.0620    | 0.1583   |           |                   |
| Device to artery ratio                   | 1.7403             | 0.8936    | 0.0515   |           |                   |
| Postdilatation                           | 0.1742             | 0.2945    | 0.5542   |           |                   |
| Postdil. balloon diam                    | -0.1163            | 0.5352    | 0.8280   |           |                   |
| Postdil. balloon length                  | -0.0260            | 0.0570    | 0.6480   |           |                   |
| Postdil. balloon pressure                | 0.0081             | 0.0574    | 0.8878   |           |                   |
| Final residual stenosis                  | -0.0414            | 0.0409    | 0.3106   |           |                   |
| Calcium > 180°                           | 0.7898             | 0.2146    | 0.0002   |           |                   |
| <b>Multivariate Analysis</b>             |                    |           |          |           |                   |
|                                          | <b>Coefficient</b> | <b>SE</b> | <b>p</b> | <b>OR</b> | <b>95%CI</b>      |
| <b>CABG</b>                              | 2.8782             | 0.7656    | 0.0002   | 17.7831   | 3.9660 to 79.7378 |
| <b>Vessel</b>                            | -0.7570            | 0.2448    | 0.0020   | 0.4691    | 0.2903 to 0.7578  |

|                                              |         |                  |        |        |                  |
|----------------------------------------------|---------|------------------|--------|--------|------------------|
| <b>ACC/AHA Type</b>                          | -0.0142 | 0.1679           | 0.9325 | 0.9859 | 0.7094 to 1.3701 |
| <b>Predil. Balloon diameter</b>              | 0.1090  | 0.0497           | 0.0281 | 1.1152 | 1.0118 to 1.2292 |
| <b>Residual stenosis after predilatation</b> | 0.0134  | 0.0067           | 0.0454 | 1.0135 | 1.0003 to 1.0269 |
| <b>Calcium &gt;180°</b>                      | 1.2420  | 0.2885           | 0.0000 | 3.4627 | 1.9672 to 6.0951 |
| <b>Time from index to OCT</b>                | 1.0053  | 1.0037 to 1.0070 | 0.0053 | 0.0008 | 0.0000           |

**Supplemental Table S3. Device failures.**

| Time From Index to OCT | Sex    | Reason for PCI | Vessel | Device | Lesion Type | Predilatation | Postdilatation | Antiplatelet Therapy     | Sizing | Fractures | Fracture Type (Most Severe) |
|------------------------|--------|----------------|--------|--------|-------------|---------------|----------------|--------------------------|--------|-----------|-----------------------------|
| <b>Thrombosis</b>      |        |                |        |        |             |               |                |                          |        |           |                             |
| 4                      | Male   | NSTEMI         | LCX    | DES    | C           | yes           | No             | Clopidogrel, ongoing     | 1.10   | 0         | 0                           |
| 262                    | Male   | UnstAng        | LCX    | BRS    | B2          | yes           | No             | Prasugrel, ongoing       | 1.12   | 1         | 3                           |
| 455                    | Male   | CCS            | LCX    | BRS    | B2          | yes           | Yes            | Clopidogrel, interrupted | 1.04   | 1         | 3                           |
| 0                      | Male   | CCS            | LCX    | DES    | B2          | yes           | Yes            | Prasugrel                | 1.17   | 1         | 3                           |
| 367                    | Male   | UnstAng        | RCA    | BRS    | B2          | yes           | No             | Clopidogrel, interrupted | 1.17   | 1         | 3                           |
| 690                    | Female | NSTEMI         | LAD    | BRS    | A           | yes           | Yes            | Prasugrel, interrupted   | 1.34   | 1         | 4                           |
| 690                    | Female | NSTEMI         | LAD    | BRS    | A           | yes           | Yes            | Prasugrel, interrupted   | 1.18   | 1         | 4                           |
| 635                    | Male   | STEMI          | LAD    | BRS    | C           | No            | No             | Prasugrel, interrupted   | 1.42   | 1         | 2                           |
| 549                    | Male   | CCS            | LCX    | BRS    | B2          | yes           | No             | Clopidogrel, interrupted | 1.54   | 1         | 4                           |
| 0                      | Male   | STEMI          | LCX    | DES    | B1          | yes           | No             | Ticagrelor               | 0.86   | 1         | 1                           |
| 0                      | Female | NSTEMI         | RCA    | BRS    | B1          | yes           | Yes            | Prasugrel                | 1.30   | 0         | 0                           |
| 0                      | 0      | STEMI          | RCA    | BRS    | C           | yes           | Yes            | Prasugrel                | 1.02   | 1         | 3                           |
| 578                    | Male   | STEMI          | RCA    | DES    | A           | yes           | Yes            | Ticagrelor, interrupted  | 1.20   | 1         | 4                           |
| 0                      | Male   | CCS            | RCA    | BRS    | B2          | yes           | Yes            | Prasugrel                | 1.08   | 0         | 0                           |
| 762                    | Male   | CCS            | LCX    | BRS    | B2          | yes           | Yes            | Ticagrelor, interrupted  | 2.00   | 1         | 3                           |
| 762                    | Male   | CCS            | LCX    | BRS    | B2          | yes           | Yes            | Ticagrelor, interrupted  | 1.59   | 1         | 3                           |
| 0                      | Male   | STEMI          | LAD    | DES    | B1          | yes           | No             | Prasugrel                | 1.18   | 0         | 0                           |
| 0                      | Male   | STEMI          | LAD    | DES    | B1          | yes           | No             | Prasugrel                | 1.11   | 0         | 0                           |
| 0                      | Male   | STEMI          | RIVA   | DES    | B2          | yes           | No             | Ticagrelor               | 1.42   | 0         | 0                           |
| 145                    | Male   | NSTEMI         | RCX    | DES    | B2          | yes           | no             | Clopidogrel              | 1.38   | 1         | 3                           |
| <b>Restenosis</b>      |        |                |        |        |             |               |                |                          |        |           |                             |
| 600                    | Male   | CCS            | LCX    | DES    | B2          | yes           | No             | Prasugrel                | 0.84   | 1         | 1                           |
| 630                    | Male   | CCS            | LAD    | DES    | B2          | yes           | No             | Prasugrel                | 0.83   | 1         | 2                           |
| 294                    | Male   | UnstAng        | LCX    | BRS    | C           | yes           | Yes            | Prasugrel                | 0.87   | 1         | 1                           |
| 374                    | Male   | CCS            | RCA    | BRS    | B2          | yes           | No             | Prasugrel                | 1.20   | 0         | 0                           |
| 529                    | Male   | CCS            | LCX    | BRS    | C           | yes           | Yes            | Prasugrel                | 1.31   | 1         | 1                           |

|     |        |         |      |     |    |     |     |             |      |   |   |
|-----|--------|---------|------|-----|----|-----|-----|-------------|------|---|---|
| 790 | Male   | UnstAng | LAD  | BRS | B1 | yes | No  | Clopidogrel | 1.81 | 1 | 1 |
| 390 | Male   | STEMI   | RCA  | BRS | C  | yes | No  | Prasugrel   | 1.02 | 1 | 4 |
| 194 | Male   | CCS     | LCX  | BRS | B1 | yes | Yes | Prasugrel   | 1.28 | 1 | 1 |
| 469 | Female | NSTEMI  | LCX  | BRS | B2 | yes | Yes | Prasugrel   | 1.63 | 1 | 4 |
| 778 | Female | CCS     | RCA  | BRS | A  | yes | Yes | Prasugrel   | 1.78 | 0 | 0 |
| 778 | Female | CCS     | RCA  | BRS | A  | yes | Yes | Prasugrel   | 1.70 | 0 | 0 |
| 226 | Male   | NSTEMI  | LAD  | BRS | C  | yes | Yes | Prasugrel   | 1.15 | 1 | 2 |
| 863 | Male   | NSTEMI  | LAD  | BRS | A  | yes | Yes | Prasugrel   | 1.45 | 1 | 1 |
| 180 | Female | CCS     | LCX  | DES | B1 | yes | No  | Clopidogrel | 1.50 | 1 | 1 |
| 180 | Female | CCS     | LCX  | DES | B1 | yes | No  | Clopidogrel | 1.41 | 1 | 4 |
| 300 | Male   | CCS     | LCX  | DES | A  | yes | Yes | Clopidogrel | 1.15 | 1 | 1 |
| 371 | Male   | STEMI   | LCX  | DES | B2 | yes | Yes | Ticagrelor  | 1.01 | 0 | 0 |
| 360 | Male   | CCS     | LAD  | BRS | A  | yes | Yes | Clopidogrel | 1.24 | 0 | 0 |
| 188 | Male   | CCS     | RCA  | DES | B2 | yes | no  | Prasugrel   | 1.50 | 0 | 0 |
| 168 | Male   | CCS     | RCA  | DES | B2 | yes | no  | Prasugrel   | 1,74 | 1 | 4 |
| 18  | Female | CCS     | LAD  | DES | B2 | yes | no  | Ticagrelor  | 1,48 | 0 | 0 |
| 144 | Male   | CCS     | RCA  | DES | B2 | yes | no  | Clopidogrel | 1,21 | 1 | 3 |
| 188 | Male   | CCS     | RCA  | DES | B2 | yes | no  | Clopidogrel | 1,21 | 1 | 4 |
| 257 | Female | CCS     | LAD  | DES | B2 | Yes | Yes | Clopidogrel | 1.34 | 1 | 4 |
| 814 | Male   | CCS     | LAD  | DES | B2 | Yes | Yes | Clopidogrel | 1.05 | 0 | 0 |
| 106 | Female | CCS     | LAD  | DES | B2 | Yes | Yes | Clopidogrel | 1.18 | 1 | 1 |
| 0   | Male   | CCS     | RCA  | DES | B2 | Yes | no  | Clopidogrel | 1.37 | 1 | 3 |
| 192 | Male   | CCS     | RCA  | DES | B2 | Yes | Yes | Prasugrel   | 1.83 | 1 | 3 |
| 805 | Male   | CCS     | RCX  | DES | B2 | yes | Yes | Clopidogrel | 1.25 | 0 | 0 |
| 0   | Male   | CCS     | RCA  | DES | B2 | yes | No  | Ticagrelor  | 1.49 | 1 | 3 |
| 187 | Male   | CCS     | LM   | DES | B2 | yes | No  | Clopidogrel | 1.41 | 1 | 0 |
| 780 | Male   | UnstAng | RIVA | DES | B2 | yes | No  | Prasugrel   | 1.15 | 0 | 0 |
| 188 | Male   | CCS     | RCA  | DES | B2 | yes | No  | Clopidogrel | 1.38 | 0 | 0 |
| 0   | Male   | CCS     | RCA  | DES | B2 | yes | No  | Clopidogrel | 1.16 | 1 | 4 |

LCX: left circumflex; LAD: left anterior descending; CCS: chronic coronary syndrome. Sizing: ratio of device to artery.

**Supplemental S4A.** A Multivariate analysis of the predictors of device failure–metallic stents.

|                          | Odd's Ratio | CI          | p      |
|--------------------------|-------------|-------------|--------|
| <b>Thrombus Fracture</b> | 1.4         | 0.4 to 5.1  | 0.61   |
|                          | 12.5        | 5.3 to 29.4 | 0.0000 |

**Supplemental Table S4B.** Multivariate analysis of the predictors of device failure–bioresorbable scaffolds.

|                               | Odd's ratio | CI             | p      |
|-------------------------------|-------------|----------------|--------|
| <b>Fractures</b>              | 7.2         | 2.2 to 23.2    | 0.0010 |
| <b>Smoking</b>                | 1.3         | 0.9 to 1.8     | 0.1559 |
| <b>Prior PCI</b>              | 2.0         | 0.7 to 5.8     | 0.2212 |
| <b>Malappositions</b>         | 0.2         | 0.02 to 1.6    | 0.1303 |
| <b>Calcium &gt;180°</b>       | 1.3         | 0.7 to 2.8     | 0.4178 |
| <b>Device-to-artery ratio</b> | 202.8       | 17.0 to 2413.8 | 0.0000 |

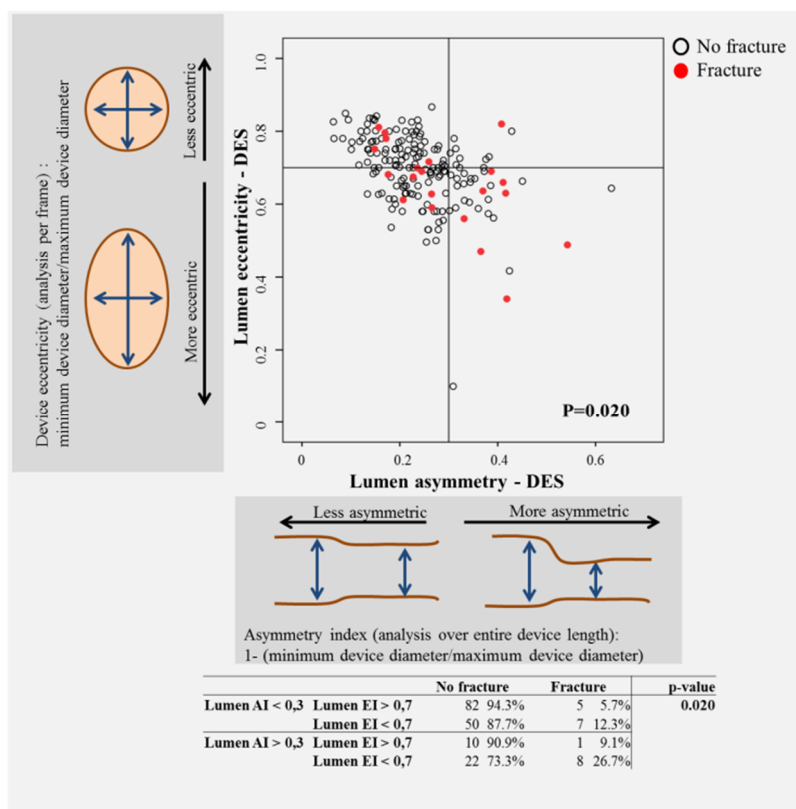

Supplemental Figure S1. Asymmetry and eccentricity for drug eluting stents.

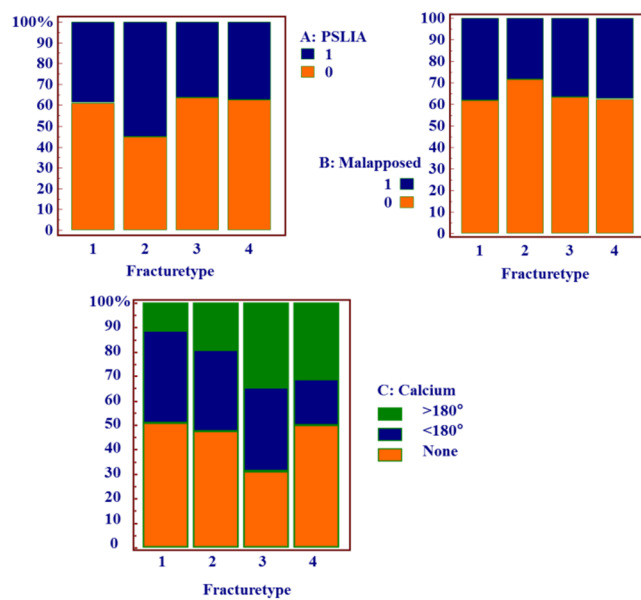

Supplemental Figure S2. Incidence of peri-strut low intensity areas (PSLIA, A), malapposition (B) and calcium (C) by fracture type.

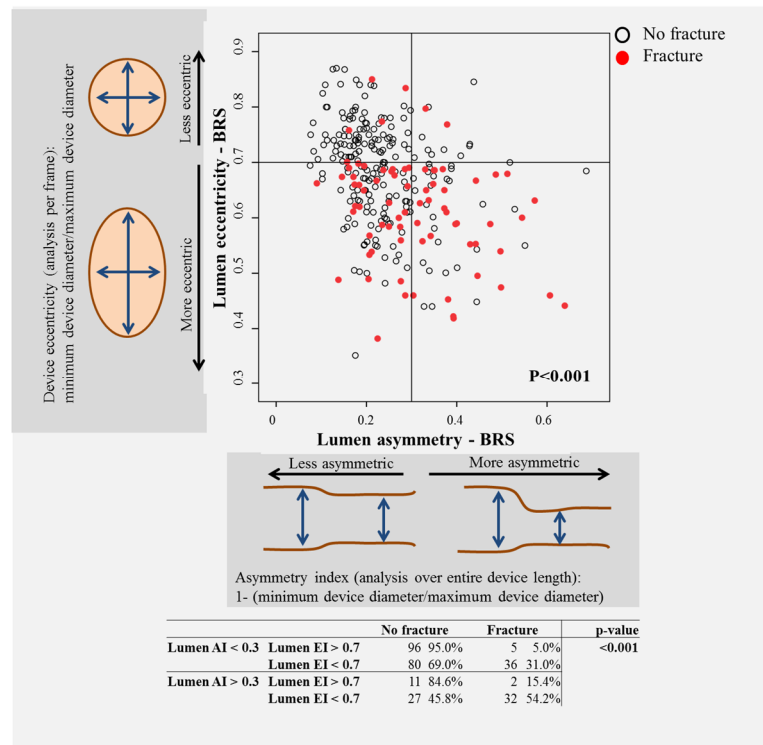

Supplemental Figure S3. Asymmetry and eccentricity in scaffolds

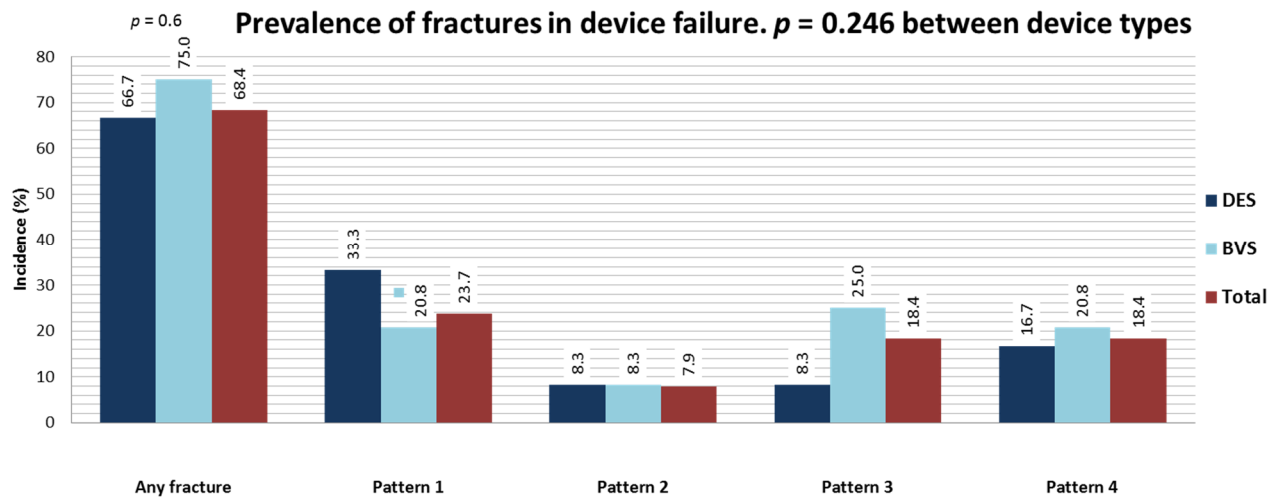

Supplemental Figure S4. Prevalence of fractures in device failure
